# Supplementary material for: Risk Factors for Emergency Department Unscheduled Return Visits
Source: PubMed Central journal article supplement (PMC6723936; doi:10.3390/medicina55080457), 2019-08-09
Supplement: medicina-55-00457-s001.pdf [file medicina-55-00457-s001.pdf]

**Table S1.** Groupings of presenting complaints.

| Grouping of complaints            | Presenting complaints (non-exhaustive)                                                                        | Examples of eventual diagnoses   |
|-----------------------------------|---------------------------------------------------------------------------------------------------------------|----------------------------------|
| Abdominal pain                    | Localized abdominal pain                                                                                      | Intestinal obstruction           |
|                                   | Generalized abdominal pain                                                                                    | Peptic ulcer disease             |
|                                   | Abdominal colic                                                                                               | Acute appendicitis               |
|                                   | Dyspepsia                                                                                                     | Biliary colic                    |
| Fever                             | Patient-documented temperature or temperature $\geq 38.0^{\circ}\text{C}$ at the ED with no localizing source | Viral fever                      |
|                                   |                                                                                                               | Neutropenic fever                |
| Gastrointestinal                  | Nausea                                                                                                        | Gastroenteritis                  |
|                                   | Vomiting                                                                                                      | Inflammatory bowel disease       |
|                                   | Diarrhea                                                                                                      | Irritable bowel syndrome         |
|                                   | Constipation                                                                                                  |                                  |
| Upper respiratory tract infection | Cough                                                                                                         | Pharyngitis                      |
|                                   | Rhinorrhea                                                                                                    | Tonsillitis                      |
|                                   | Sore throat                                                                                                   | Sinusitis                        |
| Musculoskeletal pain              | Body aches                                                                                                    | Osteoarthritis                   |
|                                   | Joint pains                                                                                                   | Rheumatoid arthritis             |
|                                   |                                                                                                               | Gout flare                       |
|                                   |                                                                                                               | Tendinitis                       |
| Trauma                            | Fall                                                                                                          | Abrasion                         |
|                                   | Burns                                                                                                         | Contusion                        |
|                                   | Cut wound                                                                                                     | Fracture                         |
|                                   | Motor vehicle accident                                                                                        | Dislocation                      |
|                                   | Minor head injury                                                                                             | Concussion                       |
| Headache                          | Localized headache (e.g. bitemporal, occipital)                                                               | Primary headache (e.g. migraine) |
|                                   |                                                                                                               | Intracranial bleed               |
|                                   | Generalized headache                                                                                          | Brain tumor                      |
| Lower back pain and sciatica      | Backache                                                                                                      | Prolapsed intervertebral disc    |
|                                   | Radiation of pain to lower limb                                                                               | Lumbar spondylosis               |

|                                        |                                   |                                      |
|----------------------------------------|-----------------------------------|--------------------------------------|
|                                        |                                   | Degenerative disc disease            |
| Chest pain                             | Angina                            | Acute myocardial infarction          |
|                                        | Pleuritic chest pain              | Spontaneous pneumothorax             |
|                                        |                                   | Atypical chest pain                  |
| Giddiness and vertigo                  | Dizziness (non-vertiginous)       | Vestibular neuritis                  |
|                                        | Vertigo                           | Benign paroxysmal positional vertigo |
| Ophthalmological and otolaryngological | Eye redness, itch, floaters       | Conjunctivitis                       |
|                                        | Ear blockage, pain, discharge     | Subconjunctival hemorrhage           |
|                                        | Foreign body in eye or ear        | Otitis media, otitis externa         |
|                                        |                                   | Cornea abrasion                      |
| Shortness of breath (excluding asthma) | Dyspnea                           | Acute bronchitis                     |
|                                        |                                   | Hyperventilation syndrome            |
|                                        |                                   | Chronic obstructive lung disease     |
| Urological                             | Dysuria                           | Urinary tract infection              |
|                                        | Hematuria                         | Benign prostatic hyperplasia         |
|                                        | Urinary frequency, urgency        | Blocked indwelling catheter          |
|                                        | Urinary retention                 |                                      |
| Dermatological                         | Generalized exanthem              | Atopic dermatitis                    |
|                                        | Localized rash                    | Varicella                            |
|                                        | Pruritus                          | Urticaria                            |
| Renal colic                            | Flank pain                        | Ureteric stones                      |
|                                        | Pain radiating to groin           |                                      |
| Obstetric and gynecological            | Dysmenorrhea                      | Endometriosis                        |
|                                        | Menorrhagia                       | Uterine fibroid                      |
|                                        | Abnormal vaginal discharge        | Pelvic inflammatory disease          |
|                                        | Vulvar mass                       | Bartholin's cyst infection           |
|                                        | Per-vaginal bleeding in pregnancy | Threatened miscarriage               |
| Cellulitis and abscess                 | Limb redness and swelling         | Cellulitis                           |
|                                        | Painful skin lump                 | Abscess                              |

|                      |                                                      |                            |
|----------------------|------------------------------------------------------|----------------------------|
|                      | Insect or animal bites                               | Bite wounds                |
| Neurological deficit | Loss of consciousness                                | Vasovagal syncope          |
|                      | Weakness                                             | Transient ischemic attack  |
|                      | Numbness, paresthesia                                | Carpal tunnel syndrome     |
| Psychiatric          | Depressed mood                                       | Acute stress reaction      |
|                      | Anxiety                                              | Depressive disorder        |
|                      | Insomnia                                             | Anxiety disorder           |
|                      | Hallucination                                        | Schizophrenia              |
| Asthma               | Wheezing                                             | Asthma exacerbation        |
|                      | Shortness of breath, cough (on background of asthma) |                            |
| Others               | Palpitations                                         | Thyrotoxicosis             |
|                      | Testicular pain                                      | Epididymo-orchitis         |
|                      | Post-operative complications                         | Dislodged nephrostomy tube |
